# Supplementary material
Source: Springer Nature journal article supplement (https://www.springermedizin.de/resource/supplementary/12985_2009_598_MOESM3_ESM.pdf/9608536)

**A**

Percentage of positive sera %

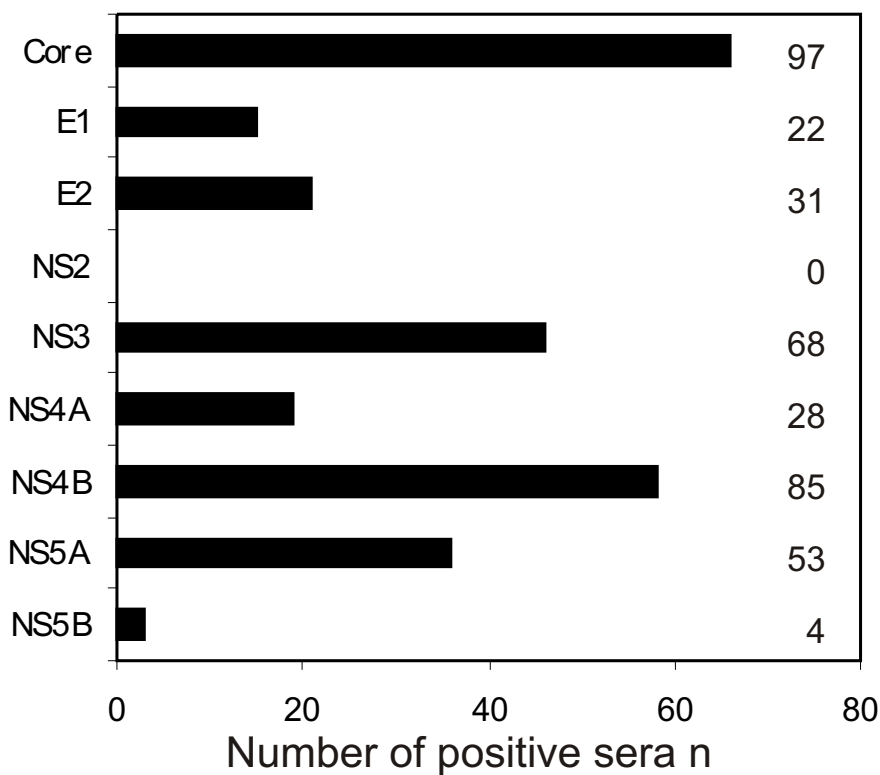**B**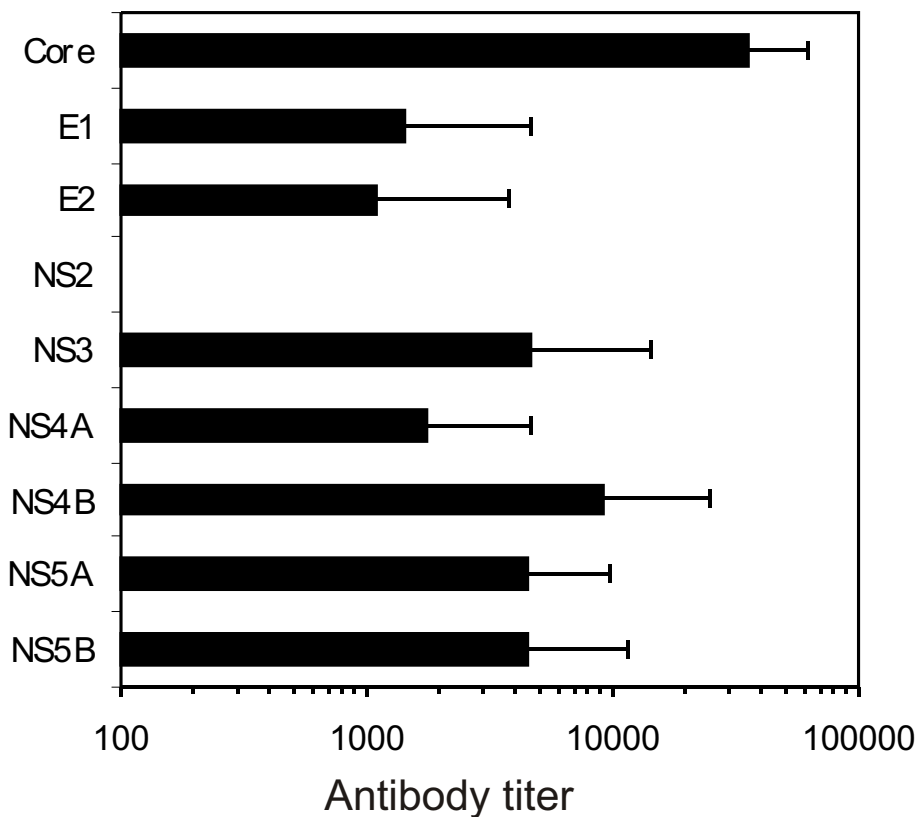

Supplement: MOESM3 [file 9608536]
